# Supplementary material for: Pathogenesis, Transmission, and Within‐Host Evolution of Bovine‐Origin Influenza D Virus in Pigs
Source: Hindawi journal article supplement (doi:10.1155/2024/9009051), 2024-01-01
Supplement: f1 [file 9009051.f1.pdf]

| Group | Pig Number | D0   | D1   | D2   | D3   | D4   | D5   | D6   | D7   | D8   | D9   | D10  | D11  | D12  | D13  | D14  | D15  | D16  | D17  | D18  | D21  | D23  | D25  | D28  |
|-------|------------|------|------|------|------|------|------|------|------|------|------|------|------|------|------|------|------|------|------|------|------|------|------|------|
| TI    | 5901       | 39.4 | 39.3 | 39.4 | 39.2 | 39   | 39   | 39.2 | 39.2 | 39.1 | 39.4 | 39.4 | 39.1 | 39.1 | 39   | 39.1 | 39.3 | 39.4 | 39.4 | 39.1 | 39.2 | 39.1 | 39.1 | 39.2 |
|       | 5939       | 39.5 | 39.4 | 39   | 39.4 | 39.8 | 39.1 | 39.1 | 39.3 | 39.2 | 39.3 | 39.3 | 39   | 39.1 | 39.1 | 39.3 | 39   | 39.3 | 39.2 | 39.2 | 39   | 39.3 | 38.9 | 38.9 |
|       | 5910       | 39.5 | 39.6 | 39.7 | 39.5 | 39.3 | 39   | 39.1 | 39.8 | 39.2 | 39.6 | 39.7 | 39.8 | 39.5 | 39.5 | 39.4 | 39.4 | 39.5 | 39.3 | 39.5 | 39.5 | 39.2 | 39.2 | 39.3 |
|       | 5943       | 39.4 | 39.7 | 39.6 | 39.4 | 39.4 | 39.2 | 39.1 | 39.5 | 39.4 | 39.2 | 39.3 | 39.2 | 39.3 | 39.5 | 39.3 | 39.4 | 39.2 | 39.3 | 39.4 | 39.2 | 39.3 | 39.4 | 39.4 |
| TIC   | 5902       | 39.1 | 39.7 | 39.8 | 40   | 39.6 | 39.2 | 39.3 | 40.1 | 39.2 | 39.6 | 39.9 | 39.5 | 39.3 | 39.5 | 39.3 | 39.6 | 39.3 | 39.5 | 39.5 | 39.4 | 39.5 | 39.4 | 39   |
|       | 5944       | 39.5 | 39.1 | 39.2 | 39.2 | 39   | 39.1 | 39   | 39.2 | 39.6 | 39.3 | 39.3 | 39.4 | 39.3 | 39.1 | 39.2 | 39   | 39.2 | 39.2 | 39.1 | 39   | 39.2 | 39.4 | 39   |
| NI    | 5904       | 39.3 | 39.5 | 39.2 | 39.6 | 39.1 | 39.4 | 39.1 | 39.3 | 39.4 | 39.4 | 39.4 | 39.4 | 39.3 | 39.2 | 39.4 | 39.2 | 39.3 | 39.1 | 39.3 | 39.4 | 39.4 | 39.4 | 39.2 |
|       | 5941       | 39.4 | 39.5 | 39.4 | 39.5 | 39.2 | 39.2 | 39.1 | 39.3 | 39.4 | 39.4 | 39   | 39.2 | 39.1 | 39.4 | 39.2 | 39.1 | 39   | 39.2 | 39   | 39.1 | 39.4 | 39.3 | 39.1 |
|       | 5912       | 39.6 | 39.3 | 39.6 | 39.7 | 39.5 | 39.1 | 39.4 | 39.6 | 39.3 | 39.2 | 39.1 | 39.3 | 39.3 | 39.3 | 39.2 | 39.4 | 39.3 | 39.5 | 39.3 | 39.3 | 39.2 | 39.1 | 39.1 |
|       | 5933       | 39.8 | 39.8 | 39.5 | 39.7 | 39.6 | 39.2 | 39.2 | 39.7 | 39.2 | 39.5 | 39.5 | 39.5 | 39.3 | 39.2 | 39.3 | 39.2 | 39.5 | 39.3 | 39.5 | 39.5 | 39.3 | 39.4 | 39.4 |
| NIC   | 5909       | 39.6 | 39.6 | 39.5 | 39.6 | 39.3 | 39.3 | 39.1 | 39.3 | 39.4 | 39.4 | 39.5 | 39.4 | 39.1 | 39.3 | 39.3 | 39.2 | 39.1 | 39.1 | 39.2 | 39.4 | 39.7 | 39.5 | 39.3 |
|       | 5932       | 39.4 | 39.5 | 39.5 | 39.4 | 39.4 | 39.2 | 39.3 | 39.4 | 39.3 | 39.4 | 39.3 | 39.5 | 39.6 | 39.3 | 39.5 | 39.3 | 39.1 | 39.2 | 39.3 | 39.2 | 39.6 | 39.2 | 39.5 |
| CTRL  | 5906       | 39.1 | 39.4 |      | 39.4 | 40.1 |      |      | 39.2 | 39.2 | 39.5 | 39.2 |      |      | 39.3 | 39.4 | 39.2 | 39.4 | 39.4 | 39.3 | 39   |      | 39.2 | 39.2 |
|       | 5940       | 39.4 | 39.6 |      | 39.4 | 39.3 |      |      | 39.2 | 39.5 | 39.3 | 39.4 |      |      | 39.4 | 39.4 | 39.3 | 39.2 | 39.3 | 39.4 | 39.1 |      | 39.1 | 39   |
|       | 5942       | 39.2 | 39.4 |      | 39.3 | 39.1 |      |      | 39.3 | 39.1 | 39.5 | 39.3 |      |      | 39.5 | 39.6 | 39.5 | 39.3 | 39.4 | 39.4 | 39.3 |      | 39.3 | 39.1 |
