# Supplementary material for: Pathogenesis, Transmission, and Within‐Host Evolution of Bovine‐Origin Influenza D Virus in Pigs
Source: Hindawi journal article supplement (doi:10.1155/2024/9009051), 2024-01-01

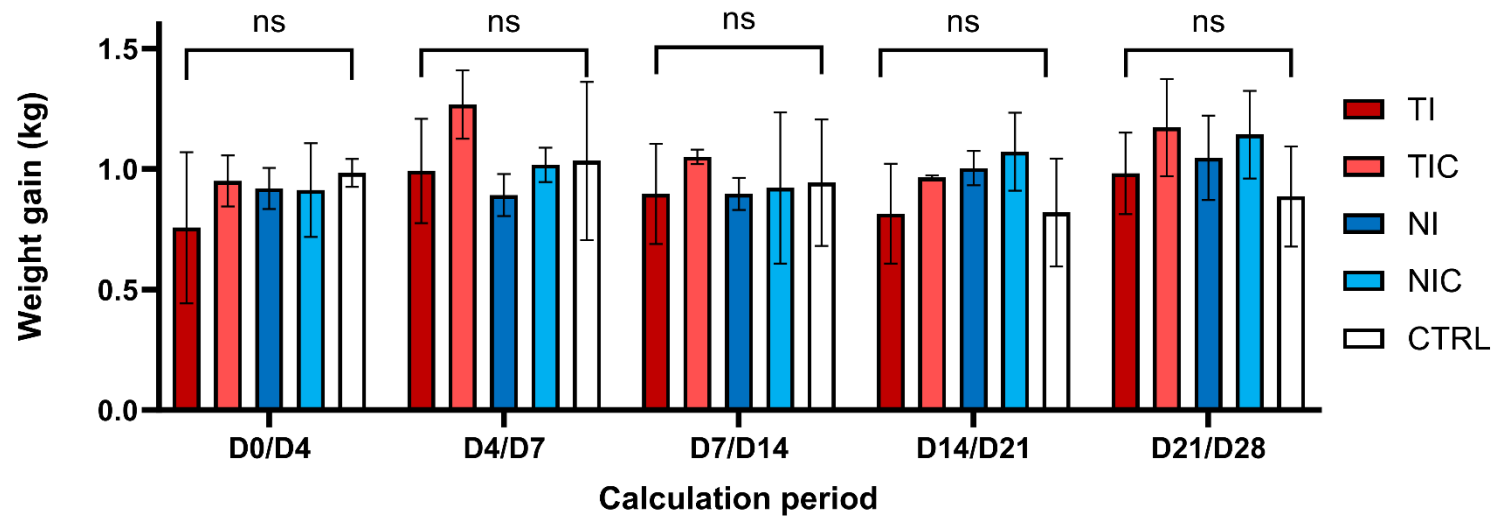

Supplement: f2 [file 9009051.f2.pdf]
