# Supplementary material for: Pathogenesis, Transmission, and Within‐Host Evolution of Bovine‐Origin Influenza D Virus in Pigs
Source: Hindawi journal article supplement (doi:10.1155/2024/9009051), 2024-01-01
Supplement: f3 [file 9009051.f3.pdf]

| Group | Pig Number | D0 | D1       | D2       | D3       | D4       | D5       | D6       | D7       | D8       | D9       | D10      | D11      | D12      | D13      | D14 |
|-------|------------|----|----------|----------|----------|----------|----------|----------|----------|----------|----------|----------|----------|----------|----------|-----|
| TI    | 5901       |    |          | 5,13E+01 | 1,38E+03 | 1,48E+04 | 6,17E+04 | 1,55E+02 |          |          |          |          |          |          |          |     |
|       | 5939       |    |          | 5,13E+02 |          | 6,76E+03 | 1,00E+04 | 1,48E+02 |          |          |          |          |          |          |          |     |
|       | 5910       |    |          |          |          |          | 8,32E+03 | 1,00E+03 |          |          |          |          |          |          |          |     |
|       | 5943       |    |          |          | 4,90E+02 | 3,72E+02 | 6,76E+03 | 4,27E+03 | 1,74E+02 |          |          |          |          |          |          |     |
| TIC   | 5902       |    |          |          |          |          |          | 1,48E+04 |          | 3,63E+05 | 4,27E+03 | 4,90E+05 | 1,95E+05 | 4,27E+03 | 4,90E+01 |     |
|       | 5944       |    |          |          |          |          |          |          | 2,69E+04 | 4,90E+04 | 4,27E+04 | 3,16E+05 | 1,00E+03 |          |          |     |
| NI    | 5904       |    | 8,32E+02 | 2,09E+04 | 1,51E+04 | 3,16E+04 | 4,27E+03 | 7,94E+02 |          |          |          |          |          |          |          |     |
|       | 5941       |    | 1,48E+02 | 7,94E+04 | 1,95E+04 | 1,74E+04 | 2,75E+03 |          |          |          |          |          |          |          |          |     |
|       | 5912       |    | 5,13E+02 | 6,17E+04 | 8,32E+03 | 8,13E+03 | 5,62E+03 |          |          |          |          |          |          |          |          |     |
|       | 5933       |    | 3,63E+03 | 6,76E+03 | 6,76E+03 | 5,75E+03 | 1,48E+03 |          |          |          |          |          |          |          |          |     |
| NIC   | 5909       |    |          |          |          | 2,69E+02 | 3,16E+03 | 3,63E+01 | 6,17E+04 | 5,13E+04 | 3,16E+05 | 1,00E+03 |          |          |          |     |
|       | 5932       |    |          |          |          |          | 6,76E+04 | 3,16E+04 | 1,48E+05 | 2,04E+05 |          |          |          |          |          |     |
