# Supplementary material for: Pathogenesis, Transmission, and Within‐Host Evolution of Bovine‐Origin Influenza D Virus in Pigs
Source: Hindawi journal article supplement (doi:10.1155/2024/9009051), 2024-01-01
Supplement: f4 [file 9009051.f4.pdf]

| HEF-encoding gene (ORF) sequence |                    |             | HEF protein sequence |                    |             | Non-synonymous mutation (yes/no) |
|----------------------------------|--------------------|-------------|----------------------|--------------------|-------------|----------------------------------|
| Nucleotide number                | KM392471 reference | P0 inoculum | Amino acid position  | KM392471 reference | P0 inoculum |                                  |
| 747                              | C                  | T           | 252                  | A                  | V           | yes                              |
| 850                              | R                  | G           | 276                  | M/V                | V           | no                               |
| 892                              | G                  | A           | 290                  | G                  | R           | yes                              |
| 947                              | R                  | G           | 308                  | R/K                | R           | no                               |
| 1512                             | W                  | T           | 496                  | R/S                | S           | no                               |
